# Supplementary material for: Cross-Modal Distortion of Time Perception: Demerging the Effects of Observed and Performed Motion
Source: PLOS journal article supplement (doi:10.1371/journal.pone.0038092), 2012-06-12
Supplement: S4 (10.1371/journal.pone.0038092.s004) [file journal.pone.0038092.s004]

| Exp     | TM           | Time         | Straights    | Curves       |
|---------|--------------|--------------|--------------|--------------|
| 1       | 104.0 (9.4)  | 105.4 (8.3)  | 103.5 (8.3)  | 106.8 (7.9)  |
| 1b      | 103.1 (10.4) | 105.6 (10.8) | 104.6 (8.0)  | 108.1 (11.6) |
| 2       | 110.2 (11.0) | 110.1 (11.3) | 106.6 (10.6) | 109.9 (11.8) |
| 3, Time | 102.2 (5.5)  | 106.4 (9.3)  | 103.0 (5.3)  | 103.7 (5.3)  |
| 3, TM   | 105.0 (9.4)  | 106.4 (9.3)  | 103.0 (5.3)  | 107.9 (9.5)  |
| 4       | 101.7 (11.9) | 103.3 (11.0) | 101.3 (10.8) | 104.9 (10.8) |

**Table S2.** PSE (in ms) for each experiment averaged for the Time, Time-Motion (abbreviated TM), Straights and Curves condition. Each cell contains the average over all participants, and standard deviation in brackets. In Experiment 3, the Time and Time-Motion condition are reported separately.
